# Supplementary material
Source: ML conference proceedings conference paper supplement (https://proceedings.mlr.press/v84/kamthe18a.html)
Supplement: Supplementary file [file kamthe18a-supp.pdf]

---

# Data-Efficient Reinforcement Learning with Probabilistic Model Predictive Control

---

Sanket Kamthe  
Department of Computing  
Imperial College London

Marc Peter Deisenroth  
Department of Computing  
Imperial College London

## 1 Appendix

### 1.1 Lipschitz Continuity

**Lemma 1.** The moment matching mapping  $f_{MM}$  is Lipschitz continuous for controls defined over a compact set  $\mathcal{U}$ .

**Proof:** Lipschitz continuity requires that the gradient  $\partial f_{MM}/\partial \mathbf{u}_t$  is bounded. The gradient is

$$\frac{\partial f_{MM}}{\partial \mathbf{u}_t} = \frac{\partial \mathbf{z}_{t+1}}{\partial \mathbf{u}_t} = \left[ \frac{\partial \boldsymbol{\mu}_{t+1}}{\partial \mathbf{u}_t}, \frac{\partial \boldsymbol{\Sigma}_{t+1}}{\partial \mathbf{u}_t} \right]. \quad (1)$$

The derivatives  $\left[ \frac{\partial \boldsymbol{\mu}_{t+1}}{\partial \mathbf{u}_t}, \frac{\partial \boldsymbol{\Sigma}_{t+1}}{\partial \mathbf{u}_t} \right]$  can be computed analytically [1].

We first show that the derivative  $\partial \boldsymbol{\mu}_{t+1}/\partial \mathbf{u}_t$  is bounded. Defining  $\boldsymbol{\beta}_d := (\mathbf{K}_d + \sigma_{f_d}^2 \mathbf{I})^{-1} \mathbf{y}_d$ , from [1], we obtain for all state dimensions  $d = 1, \dots, D$

$$\mu_{t+1}^d = \sum_{i=1}^N \beta_{d_i} q_{d_i}, \quad (2)$$

$$q_{d_i} = \sigma_{f_d}^2 |\mathbf{I} + \mathbf{L}_d^{-1} \tilde{\boldsymbol{\Sigma}}_t|^{-\frac{1}{2}} \times \exp\left(-\frac{1}{2}(\tilde{\mathbf{x}}_i - \tilde{\boldsymbol{\mu}}_t)^T (\mathbf{L}_d + \tilde{\boldsymbol{\Sigma}}_t)^{-1} (\tilde{\mathbf{x}}_i - \tilde{\boldsymbol{\mu}}_t)\right), \quad (3)$$

where  $N$  is the size of the training set of the dynamics GP and  $\tilde{\mathbf{x}}_i$  the  $i$ th training input. The corresponding gradient w.r.t.  $\mathbf{u}_t$  is given by the last  $F$  elements of

$$\frac{\partial \mu_{t+1}^d}{\partial \tilde{\boldsymbol{\mu}}_t} = \sum_{i=1}^N \beta_{d_i} \frac{\partial q_{d_i}}{\partial \tilde{\boldsymbol{\mu}}_t} \quad (5)$$

$$= \sum_{i=1}^N \beta_{d_i} q_{d_i} (\tilde{\mathbf{x}}_i - \tilde{\boldsymbol{\mu}}_t)^T (\tilde{\boldsymbol{\Sigma}}_t + \mathbf{L}_d)^{-1} \in \mathbb{R}^{1 \times (D+F)} \quad (6)$$

Let us examine the individual terms in the sum on the rhs in (6): For a given trained GP  $\|\boldsymbol{\beta}_d\| < \infty$  is constant. The definition of  $q_{d_i}$  in (4) contains an exponentiated negative quadratic term, which is bounded between  $[0, 1]$ . Since  $\mathbf{I} + \mathbf{L}_d^{-1} \tilde{\boldsymbol{\Sigma}}_t$  is positive definite, the inverse determinant is defined and bounded. Finally,

$\sigma_{f_d}^2 < \infty$ , which makes  $q_{d_i} < \infty$ . The remaining term in (6) is a vector-matrix product. The matrix is regular and its inverse exists and is bounded (and constant as a function of  $\mathbf{u}_t$ ). Since  $\mathbf{u}_t \in \mathcal{U}$  where  $\mathcal{U}$  is compact, we can also conclude that the vector difference in (6) is finite, which overall proves that  $f_{MM}$  is (locally) Lipschitz continuous and Lemma 1.

### 1.2 Sequential Quadratic Programming

We can use SQP for solving non-linear optimization problems (NLP) of the form,

$$\begin{aligned} \min_{\mathbf{x}} \quad & f(\mathbf{x}) \\ \text{s.t.} \quad & b(\mathbf{x}) \geq 0 \\ & c(\mathbf{x}) = 0. \end{aligned}$$

The Lagrangian  $\mathcal{L}$  associated with the NLP is

$$\mathcal{L}(\mathbf{x}, \boldsymbol{\lambda}, \boldsymbol{\sigma}) = f(\mathbf{x}) - \boldsymbol{\sigma}^T b(\mathbf{x}) - \boldsymbol{\lambda}^T c(\mathbf{x}) \quad (7)$$

where,  $\boldsymbol{\lambda}$  and  $\boldsymbol{\sigma}$  are Lagrange multipliers. Sequential Quadratic Programming (SQP) forms a quadratic (Taylor) approximation of the objective and linear approximation of constraints at each iteration  $k$

$$\begin{aligned} \min_{\mathbf{d}} \quad & f(\mathbf{x}_k) + \nabla f(\mathbf{x}_k)^T \mathbf{d} + \frac{1}{2} \mathbf{d}^T \nabla_{xx}^2 \mathcal{L}(\mathbf{x}, \boldsymbol{\lambda}, \boldsymbol{\sigma}) \mathbf{d} \\ \text{s.t.} \quad & b(\mathbf{x}_k) + \nabla b(\mathbf{x}_k)^T \mathbf{d} \geq 0 \\ & c(\mathbf{x}_k) + \nabla c(\mathbf{x}_k)^T \mathbf{d} = 0. \end{aligned} \quad (8)$$

The Lagrange multipliers  $\boldsymbol{\lambda}$  associated with the equality constraint are same as the ones defined in the control Hamiltonian  $\mathcal{H}$  ???. The Hessian matrix  $\nabla_{xx}^2$  can be computed by exploiting the block diagonal structure introduced by the Hamiltonian [? ? ].

### 1.3 Moment Matching Approximation [1]

Following the law of iterated expectations, for target dimensions  $a = 1, \dots, D$ , we obtain the *predictive mean*

$$\begin{aligned} \mu_t^a &= \mathbb{E}_{\tilde{\mathbf{x}}_{t-1}}[\mathbb{E}_{f_a}[f_a(\tilde{\mathbf{x}}_{t-1})|\tilde{\mathbf{x}}_{t-1}]] = \mathbb{E}_{\tilde{\mathbf{x}}_{t-1}}[m_{f_a}(\tilde{\mathbf{x}}_{t-1})] \\ &= \int m_{f_a}(\tilde{\mathbf{x}}_{t-1})\mathcal{N}(\tilde{\mathbf{x}}_{t-1} | \tilde{\boldsymbol{\mu}}_{t-1}, \tilde{\boldsymbol{\Sigma}}_{t-1})d\tilde{\mathbf{x}}_{t-1} \\ &= \boldsymbol{\beta}_a^T \mathbf{q}_a, \quad (9) \\ \boldsymbol{\beta}_a &= (\mathbf{K}_a + \sigma_{w_a}^2)^{-1} \mathbf{y}_a \quad (10) \end{aligned}$$

with  $\mathbf{q}_a = [q_{a_1}, \dots, q_{a_n}]^T$ . The entries of  $\mathbf{q}_a \in \mathbb{R}^n$  are computed using standard results from multiplying and integrating over Gaussians and are given by

$$\begin{aligned} q_{a_i} &= \int k_a(\tilde{\mathbf{x}}_i, \tilde{\mathbf{x}}_{t-1})\mathcal{N}(\tilde{\mathbf{x}}_{t-1} | \tilde{\boldsymbol{\mu}}_{t-1}, \tilde{\boldsymbol{\Sigma}}_{t-1})d\tilde{\mathbf{x}}_{t-1} \\ &= \sigma_{f_a}^2 |\tilde{\boldsymbol{\Sigma}}_{t-1} \boldsymbol{\Lambda}_a^{-1} + \mathbf{I}|^{-\frac{1}{2}} \exp\left(-\frac{1}{2} \boldsymbol{\nu}_i^T (\tilde{\boldsymbol{\Sigma}}_{t-1} + \boldsymbol{\Lambda}_a)^{-1} \boldsymbol{\nu}_i\right) \end{aligned} \quad (11)$$

where we define

$$\boldsymbol{\nu}_i := (\tilde{\mathbf{x}}_i - \tilde{\boldsymbol{\mu}}_{t-1}) \quad (12)$$

is the difference between the training input  $\tilde{\mathbf{x}}_i$  and the mean of the test input distribution  $p(\mathbf{x}_{t-1}, \mathbf{u}_{t-1})$ .

Computing the *predictive covariance matrix*  $\boldsymbol{\Sigma}_t \in \mathbb{R}^{D \times D}$  requires us to distinguish between diagonal elements and off-diagonal elements: Using the law of total (co-)variance, we obtain for target dimensions  $a, b = 1, \dots, D$

$$\begin{aligned} \sigma_{aa}^2 &= \mathbb{E}_{\tilde{\mathbf{x}}_{t-1}}[\text{var}_f[x_t^a | \tilde{\mathbf{x}}_{t-1}]] + \mathbb{E}_{f, \tilde{\mathbf{x}}_{t-1}}[(x_t^a)^2] - (\mu_t^a)^2, \quad (13) \\ \sigma_{ab}^2 &= \mathbb{E}_{f, \tilde{\mathbf{x}}_{t-1}}[x_t^a x_t^b] - \mu_t^a \mu_t^b, \quad a \neq b, \quad (14) \end{aligned}$$

respectively, where  $\mu_t^a$  is known from (9). The off-diagonal terms do not contain the additional term  $\mathbb{E}_{\tilde{\mathbf{x}}_{t-1}}[\text{cov}_f[x_t^a, x_t^b | \tilde{\mathbf{x}}_{t-1}]]$  because of the conditional independence assumption of the GP models. Different target dimensions do not covary for given  $\tilde{\mathbf{x}}_{t-1}$ .

We start the computation of the covariance matrix with the terms that are common to both the diagonal and the off-diagonal entries: With  $p(\tilde{\mathbf{x}}_{t-1}) = \mathcal{N}(\tilde{\mathbf{x}}_{t-1} | \tilde{\boldsymbol{\mu}}_{t-1}, \tilde{\boldsymbol{\Sigma}}_{t-1})$  and the law of iterated expectations, we obtain

$$\begin{aligned} \mathbb{E}_{f, \tilde{\mathbf{x}}_{t-1}}[x_t^a, x_t^b] &= \mathbb{E}_{\tilde{\mathbf{x}}_{t-1}}[\mathbb{E}_f[x_t^a | \tilde{\mathbf{x}}_{t-1}] \mathbb{E}_f[x_t^b | \tilde{\mathbf{x}}_{t-1}]] \\ &= \int m_f^a(\tilde{\mathbf{x}}_{t-1}) m_f^b(\tilde{\mathbf{x}}_{t-1}) p(\tilde{\mathbf{x}}_{t-1}) d\tilde{\mathbf{x}}_{t-1} \quad (15) \end{aligned}$$

because of the conditional independence of  $x_t^a$  and  $x_t^b$  given  $\tilde{\mathbf{x}}_{t-1}$ . Using the definition of the mean function,

we obtain

$$\begin{aligned} \mathbb{E}_{f, \tilde{\mathbf{x}}_{t-1}}[x_t^a x_t^b] &= \boldsymbol{\beta}_a^T \mathbf{Q} \boldsymbol{\beta}_b, \quad (16) \\ \mathbf{Q} &:= \int k_a(\tilde{\mathbf{x}}_{t-1}, \mathbf{X})^T k_b(\tilde{\mathbf{x}}_{t-1}, \mathbf{X}) p(\tilde{\mathbf{x}}_{t-1}) d\tilde{\mathbf{x}}_{t-1}. \quad (17) \end{aligned}$$

Using standard results from Gaussian multiplications and integration, we obtain the entries  $Q_{ij}$  of  $\mathbf{Q} \in \mathbb{R}^{n \times n}$

$$Q_{ij} = \frac{k_a(\tilde{\mathbf{x}}_i, \tilde{\boldsymbol{\mu}}_{t-1}) k_b(\tilde{\mathbf{x}}_j, \tilde{\boldsymbol{\mu}}_{t-1})}{\sqrt{|\mathbf{R}|}} \exp\left(\frac{1}{2} \mathbf{z}_{ij}^T \mathbf{T}^{-1} \mathbf{z}_{ij}\right) \quad (18)$$

where we define

$$\begin{aligned} \mathbf{R} &:= \tilde{\boldsymbol{\Sigma}}_{t-1} (\boldsymbol{\Lambda}_a^{-1} + \boldsymbol{\Lambda}_b^{-1}) + \mathbf{I}, \quad \mathbf{T} := \boldsymbol{\Lambda}_a^{-1} + \boldsymbol{\Lambda}_b^{-1} + \tilde{\boldsymbol{\Sigma}}_{t-1}^{-1}, \\ \mathbf{z}_{ij} &:= \boldsymbol{\Lambda}_a^{-1} \boldsymbol{\nu}_i + \boldsymbol{\Lambda}_b^{-1} \boldsymbol{\nu}_j, \end{aligned}$$

with  $\boldsymbol{\nu}_i$  taken from (12). Hence, the off-diagonal entries of  $\boldsymbol{\Sigma}_t$  are fully determined by (9)–(12), (14), (16), (17), and (18).

## References

- [1] M. P. Deisenroth, D. Fox, and C. E. Rasmussen. Gaussian Processes for Data-Efficient Learning in Robotics and Control. *Transactions on Pattern Analysis and Machine Intelligence*, 37(2):408–23, 2015.
